# Supplementary material for: CLDN6 promotes chemoresistance through GSTP1 in human breast cancer
Source: PubMed Central journal article supplement (PMC5678781; doi:10.1186/s13046-017-0627-9), 2017-11-07

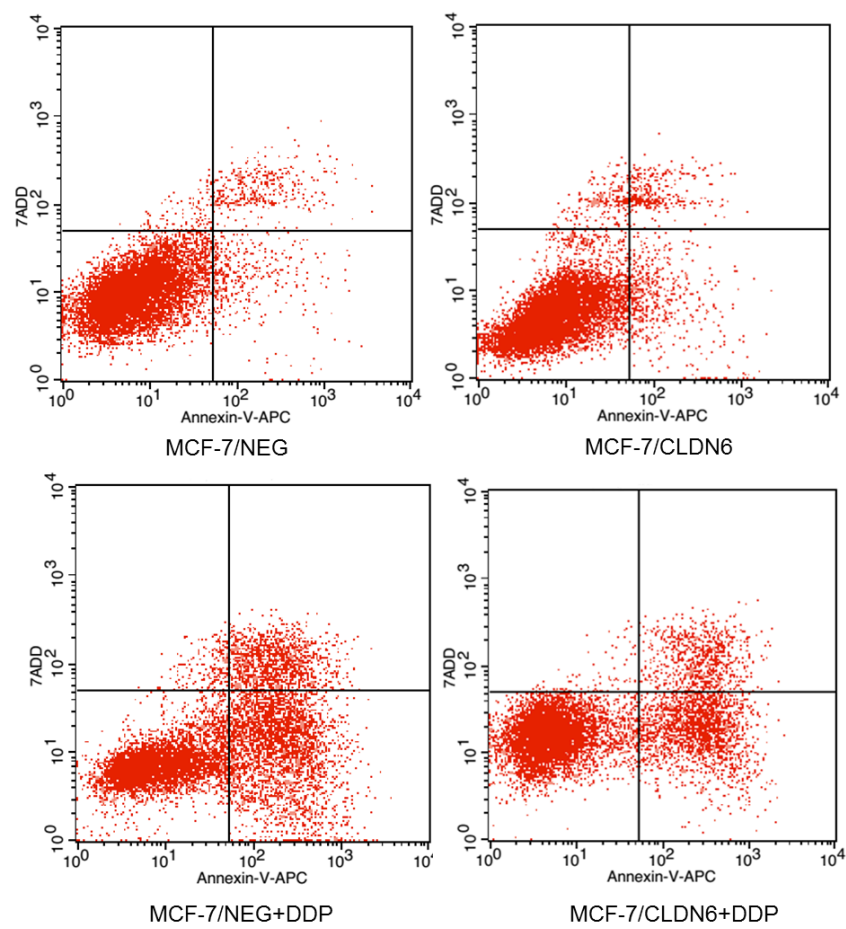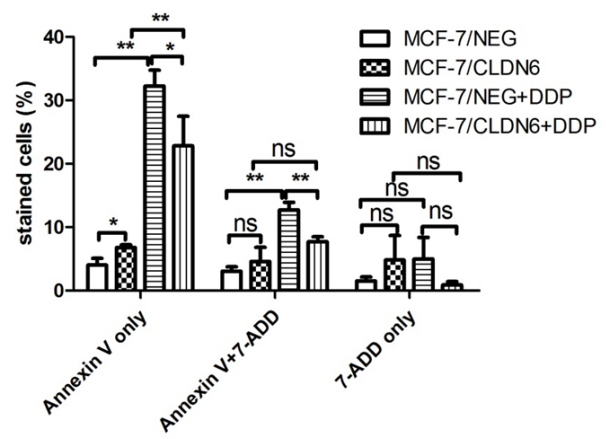

Supplement: 13046_2017_627_MOESM3_ESM.pdf [file 13046_2017_627_MOESM3_ESM.pdf]
