# Supplementary material for: CLDN6 promotes chemoresistance through GSTP1 in human breast cancer
Source: Springer Nature journal article supplement (doi:10.1186/s13046-017-0627-9), 2017-11-07

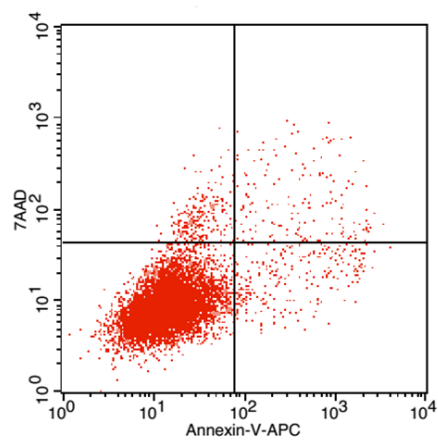

MCF-7/MDR-sh-k

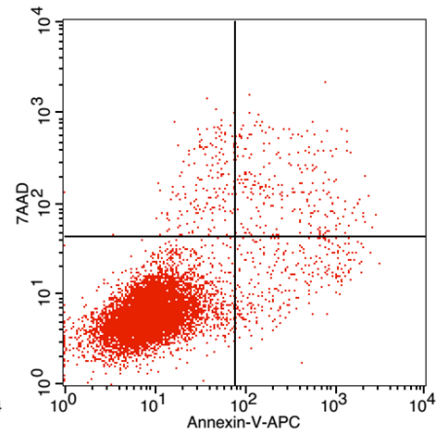

MCF-7/MDR-sh-CLDN6

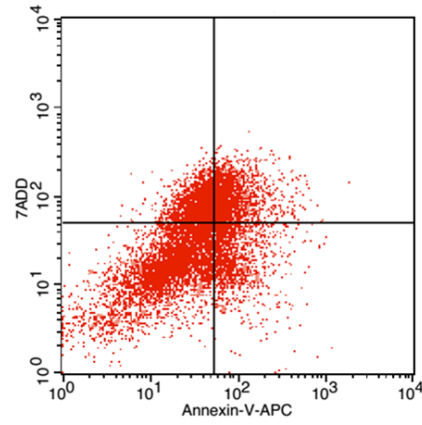

MCF-7/MDR-sh-k+DDP

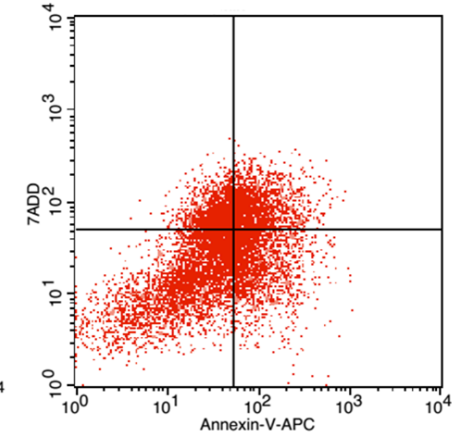

MCF-7/MDR-sh-CLDN6+DDP

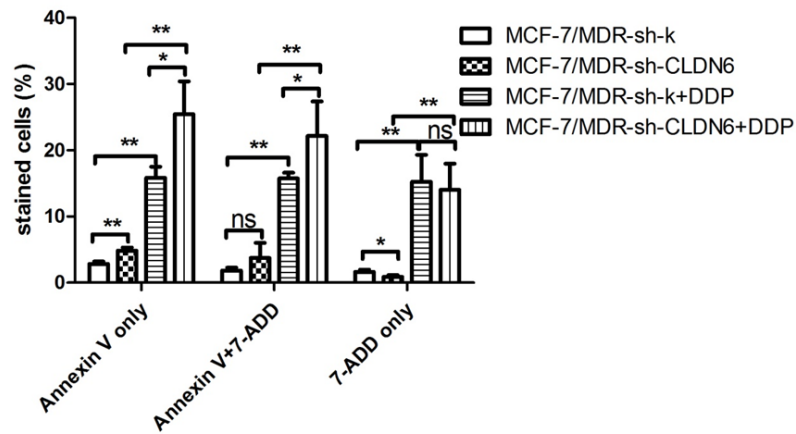

Supplement: MOESM1 [file 15205382]
