# Supplementary material for: CLDN6 promotes chemoresistance through GSTP1 in human breast cancer
Source: Springer Nature journal article supplement (doi:10.1186/s13046-017-0627-9), 2017-11-07
Supplement: MOESM4 [file 15205382]

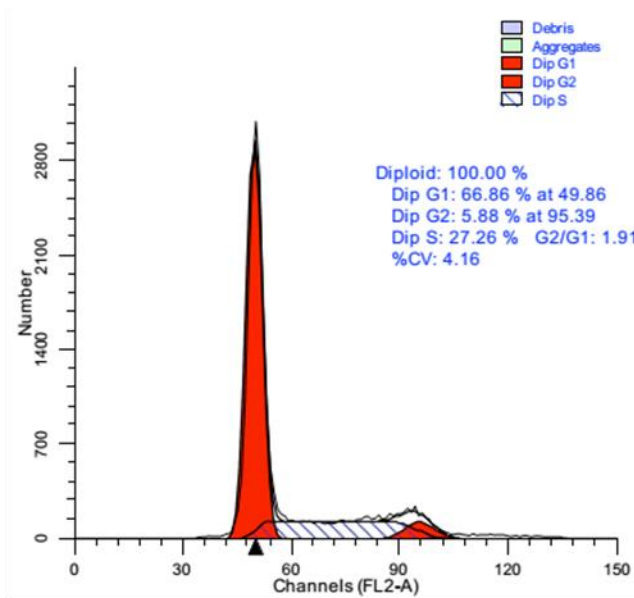

MCF-7/NEG

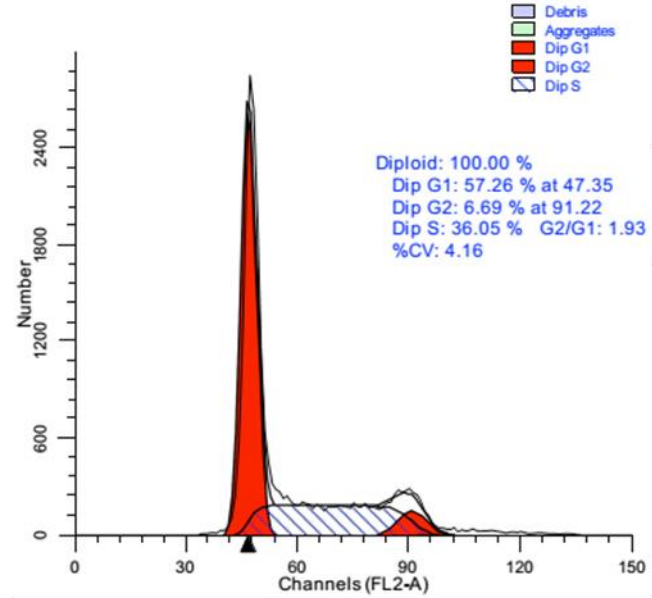

MCF-7/CLDN6

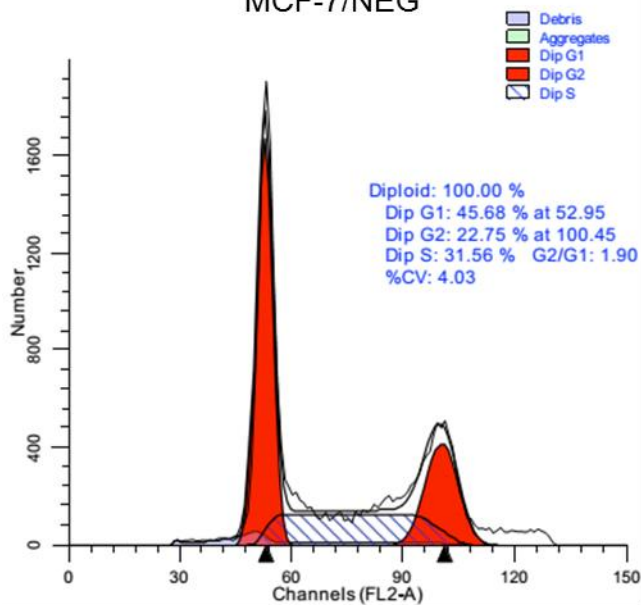

MCF-7/NEG+DDP

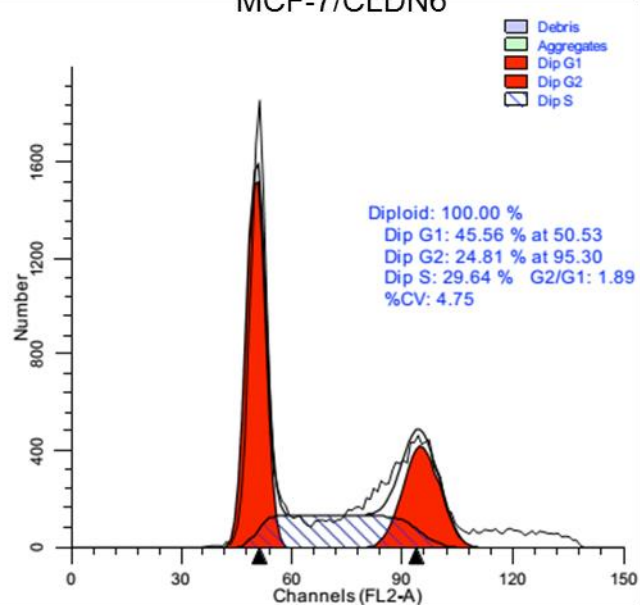

MCF-7/CLDN6+DDP
