# Supplementary material for: CLDN6 promotes chemoresistance through GSTP1 in human breast cancer
Source: Springer Nature journal article supplement (doi:10.1186/s13046-017-0627-9), 2017-11-07

A

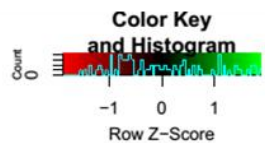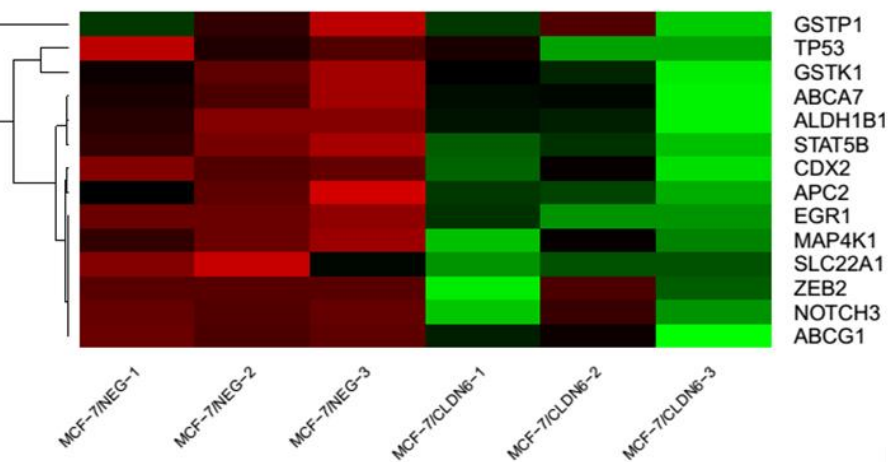

B

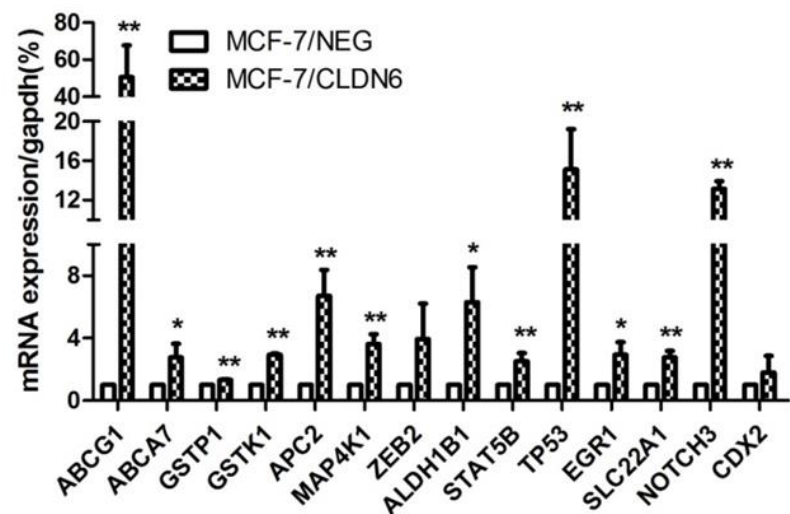

Supplement: MOESM5 [file 15205382]
